1 **Accuracy verification of low-cost CO<sub>2</sub> concentration measuring devices for**  
2 **general use as a countermeasure against COVID-19**

3 Yo Ishigaki<sup>1)</sup>, Koji Enoki<sup>1)</sup>, Shinji Yokogawa<sup>1,2)</sup>

4  
5 Affiliations:

6 1) Graduate School of Informatics and Engineering, The University of Electro-  
7 communications, Chofu, Tokyo, Japan.

8 2) Info-powered Energy System Research Center (iPERC), The University of  
9 Electro-communications, Chofu, Tokyo, Japan.

10  
11 Corresponding author:

12 Yo Ishigaki, [ishigaki@uec.ac.jp](mailto:ishigaki@uec.ac.jp), 1-5-1 Chofugaoka, Chofu, Tokyo 182-8585,  
13 Japan.

14  
15 Declaration of competing financial interests (CFI):

16 The authors indicate no conflicts of interest.

17  
18 Abstract:

19 Within the context of the COVID-19 pandemic, CO<sub>2</sub> sensors that measure  
20 ventilation conditions and thereby reduce the risk of airborne infection, are  
21 gaining increasing attention. We investigated and verified the accuracy of 12  
22 relatively low-cost sensor models that retail for less than \$45 and are advertised  
23 as infection control measures on a major e-commerce site. Our results indicate  
24 that 25% of the tested sensors can be used to identify trends in CO<sub>2</sub> concentration,  
25 if correctly calibrated. However, 67% of sensors did not respond to the presence  
26 of CO<sub>2</sub>, which suggests that a type of pseudo-technique is used to display the  
27 CO<sub>2</sub> concentration. We recommend that these sensors are not suitable for  
28 infection prevention purposes. Furthermore, 58% of the investigated sensors  
29 showed significant responses to the presence of alcohol. Owing to the  
30 widespread use of alcohol in preventing the spread of infectious diseases,

NOTE: This preprint reports new research that has not been certified by peer review and should not be used to guide clinical practice.

31 sensors that react to alcohol can display inaccurate values, resulting in  
32 inappropriate ventilation behavior. Therefore, we strongly recommended that  
33 these sensors not be used. Based on our results, we offer practical  
34 recommendations to the average consumer, who does not have special  
35 measuring equipment, on how to identify inaccurate CO<sub>2</sub> sensors.

36

## 37 **Introduction**

38 In enclosed spaces with inadequate ventilation and air treatment, the  
39 airborne spread of SARS-CoV-2 can occur even at a distance of 6 feet or more  
40 from an infected person, especially as concentrations of very fine droplets and  
41 aerosol particles drift through the air [1]. Within this context, airborne transmission  
42 may have accounted for more than 50% of the disease transmission on the  
43 Diamond Princess, the cruise ship associated with the SARS-CoV-2 outbreak in  
44 Japan [2].

45 The concentration of indoor carbon dioxide (CO<sub>2</sub>) has attracted attention as  
46 a proxy for infection risk [3]. While outdoor fresh air has a constant CO<sub>2</sub>  
47 concentration of approximately 400 ppm, human breath contains a much larger  
48 amount of CO<sub>2</sub> at 30,000–40,000 ppm. Therefore, by measuring indoor CO<sub>2</sub>  
49 concentration, it is possible to understand how much human breath is retained in  
50 the air.

51 The American Society of Health Engineers (ASHAE) states that there is a  
52 correlation between ventilation capacity and the risk of airborne infection from  
53 tuberculosis, measles, chicken pox, influenza, smallpox, and SARS [4]. The

54 Wells-Riley equation (Equation 1) can be used to quantitatively evaluate the risk  
55 of airborne infection by bacteria and viruses [5-6].

$$P = 1 - \exp\left[-\frac{Iqpt}{Q}\left\{1 - \frac{V}{Q\theta}\left[1 - \exp\left(-\frac{Q\theta}{V}\right)\right]\right\}\right] \quad (1)$$

56

57 In this equation,  $P$  is the probability that an infected person will be infected,  
58  $I$  is the number of infected persons in the enclosed space,  $p$  is the respiratory  
59 volume of one person ( $\text{m}^3/\text{h}$ ),  $q$  is the rate of infectious droplets ( $/\text{h}$ ),  $t$  is the time  
60 spent by the infected person in the space ( $\text{h}$ ),  $\theta$  is the time spent by the infected  
61 person in the space ( $\text{h}$ ),  $V$  is the volume of the room ( $\text{m}^3$ ), and  $Q$  is the ventilation  
62 rate ( $\text{m}^3/\text{h}$ ). Thus, the Wells-Riley equation models the probability of exposure to  
63 infectious droplets emitted by an infected person and inhaled by an uninfected  
64 person through respiration as the risk quantity. As infectious droplets are  
65 accompanied by a high concentration of  $\text{CO}_2$ , both of which are airborne, it is  
66 beneficial to use  $\text{CO}_2$  concentration as an indicator of the airborne infection risk.

67 A number of researchers have suggested that the threshold ventilation rate  
68 for maintaining the effective reproduction rate of tuberculosis (the ratio of new  
69 secondary infected persons to the source of infection) below 1 corresponds to a  
70  $\text{CO}_2$  concentration of 1,000 ppm. Specifically, Du et al. found that by improving  
71 the ventilation system in a poorly ventilated university building, where an outbreak  
72 of tuberculosis occurred (27 tuberculosis patients and 1,665 contacts), and by  
73 reducing the maximum  $\text{CO}_2$  concentration from  $3204 \pm 50$  to 591-603 ppm, the  
74 secondary infection rate among new contacts could be reduced to zero (mean  
75 follow-up, 5.9 years). Furthermore, the incidence of tuberculosis among contacts

76 could be reduced by 97% (95% CI: 50–99.9%) when the CO<sub>2</sub> concentration  
77 remained below 1,000 ppm [7].

78 After comprehensively considering laws and regulations concerning CO<sub>2</sub>  
79 concentration, the Occupational Hygiene and Ergonomics Subcommittee of the  
80 Japan Society for Occupational Health (JSOH) established classifications for  
81 estimating ventilation status according to CO<sub>2</sub> concentrations (Table 1), and  
82 recommended measures according to each classification [8].

83

84 Table 1 Ventilation criteria based on CO<sub>2</sub> concentrations, established by The  
85 Occupational Hygiene and Ergonomics Subcommittee of the Japan Society for  
86 Occupational Health (JSOH).

| CO <sub>2</sub> concentration | Classification  | Description                                                                                               |
|-------------------------------|-----------------|-----------------------------------------------------------------------------------------------------------|
| Less than 1,000 ppm or less   | Good            | High quality air. The status should be maintained.                                                        |
| 1,000 to 1,500 ppm or less    | Moderately good | Acceptable limits. Occasional opening of a number of windows is recommended (for a few minutes per hour). |
| 1,500 to 2,500 ppm or less    | Poor            | Open windows for at least a few minutes every half hour (fully open) and do not use the room.             |
| 2,500 to 3,500 ppm or less    | Very poor       | Open the windows all the time (fully open) and do not use the room.                                       |

|                      |                |                      |
|----------------------|----------------|----------------------|
| 3,500 ppm or greater | Extremely poor | Do not use the room. |
|----------------------|----------------|----------------------|

87

88 Like those of other countries, the Japanese Building Standard Law (revised  
89 and implemented in 2003), requires the installation of a 24-hour ventilation  
90 system in all living rooms to prevent the development of the sick building  
91 syndrome, and requires an air change rate per hour (ACPH) of 0.5 times/h or  
92 more inside houses. With an ACPH of 0.5 times/h, for example, in a 70 m<sup>2</sup> space  
93 with a standard activity level, the CO<sub>2</sub> concentration at saturation is 800 ppm with  
94 two people in the room, 1,000 ppm with three people in the room, and 1,200 ppm  
95 with four people in the room.

96 While the Building Standard Law specifies the amount of ventilation, Japan's  
97 Building Management Law (enacted in 1970) specifies CO<sub>2</sub> concentration  
98 standards. These laws specify that in buildings used as entertainment venues,  
99 department stores, restaurants, shops, offices, and schools, where the enclosed  
100 area used for specific purposes is 3,000 m<sup>2</sup> or more, defined as "specified  
101 buildings" (> 8,000 m<sup>2</sup> for schools), the CO<sub>2</sub> concentration should be 1,000 ppm  
102 or less.

103 Against this background, the monitoring of CO<sub>2</sub> concentration by sensors is  
104 currently being advocated to reduce the risk of COVID-19 in indoor environments.  
105 In many instances, especially in the context of a pandemics, it is recommended  
106 to maintain indoor CO<sub>2</sub> concentrations below 800 ppm (e.g., Minnesota  
107 Department of Health, Federation of European Heating Ventilation and Air  
108 Conditioning Associations, UK Scientific Advisory Group for Emergency, US

109 Centers for Disease Control and Prevention) [9]. In Japan, a widespread system  
110 is used, in which local government supports the cost of installing CO<sub>2</sub> sensors in  
111 restaurants to prevent the spread of COVID-19. For example, the Tokyo  
112 Metropolitan Government, Kyoto Prefecture, and Osaka City support the  
113 purchase of infection prevention devices, including CO<sub>2</sub> sensors, up to 100,000–  
114 300,000 yen. In addition, Shibuya Ward in Tokyo distributes free CO<sub>2</sub> sensors to  
115 restaurants located in the ward.

116 In response to this sudden increase in demand, low-cost CO<sub>2</sub> sensors have  
117 rapidly become available on e-commerce sites such as Amazon, and are  
118 advertised as being effective in preventing the spread of infectious diseases.  
119 Many of these sensors have vague descriptions of their measurement principles,  
120 with several consumers questioning the CO<sub>2</sub> measuring ability of these sensors.  
121 In addition, there is a lack of guidelines for the use of CO<sub>2</sub> sensors in Japan, and  
122 a lack of laws or regulations regarding their accuracy and reliability. In response  
123 to this research need, we purchased several low-cost CO<sub>2</sub> sensors, to verify their  
124 accuracy and investigate the related measurement principles.

125 Although several studies have already evaluated low-cost gas sensors [10,  
126 11], including CO<sub>2</sub> sensors, the global outbreak of COVID-19 has led to a  
127 proliferation of new products on the market for the control of infectious diseases  
128 that have not been tested for efficacy and accuracy. Therefore, we conducted this  
129 study to investigate the accuracy and reliability of these sensors and to offer  
130 advice on these sensors to the general consumer, who does not have access to  
131 specialized inspection equipment.

132

## 133 **Methodology**

134 In this study, we purchased and investigated 12 relatively low-cost CO<sub>2</sub>  
135 sensors (1–12; Table 2), within a price range of 2,900–4,999 JPY (approximately  
136 26–45 USD, at the exchange rate in July 28, 2021) from the Amazon Japan  
137 website, and installed them according to instructions. The sensors were  
138 advertised as being effective in preventing COVID-19 infections. In addition to the  
139 12 sensors, we purchased two relatively expensive CO<sub>2</sub> sensors, (A and B) that  
140 are widely used for industrial and experimental purposes as reference devices.  
141 Sensor A is manufactured by the T&D corporation TR-76Ui (54,780 JPY,  
142 approximately 500 USD), with a zero and 1500 ppm span calibration, while  
143 Sensor B is manufactured and factory calibrated by the C.H.C. System  
144 corporation NMA-PR-R (47,500 JPY, approximately 430 USD). Both sensors A  
145 and B are based on the non-dispersive infrared (NDIR) method.

146 All 14 sensors (1 to 12, A and B) were activated simultaneously and placed  
147 in a chamber (Fig. 1). The following protocol was used for the experiment:

148

- 149 1. Open the chamber lid.
- 150 2. Turn on the fan.
- 151 3. Ventilate the chamber with room air (adjusted to 25°C) for 5 min.
- 152 4. Close the chamber lid.
- 153 5. Turn off the fan.
- 154 6. <FRESH AIR> Record the displayed values of each measuring  
155 instrument. However, if a value outside the measurement range is  
156 displayed, it is not recorded.

- 157 7. Turn on the fan.
- 158 8. <INJECTION> Inject (additional) CO<sub>2</sub> gas, (additional) room air and/or
- 159 alcohol into the chamber to change the gas concentration in the chamber.
- 160 9. Wait for 5 min until the inner air and gas are evenly mixed in the chamber.
- 161 10. Turn off the fan.
- 162 11. <CONTROLLED ATMOSPHERE> Record the displayed values of each
- 163 measuring instrument. However, if a value outside the measurement
- 164 range is displayed, it is not recorded.
- 165 12. Return to step 7 (or terminate the experiment).
- 166

167 Table 2 List of CO<sub>2</sub> sensors used in the experiment.

| ID | Manufacturer and/or product name indicated on the purchase page | Price (JPY) | Claimed specifications on the purchase page |                   |                                                  |
|----|-----------------------------------------------------------------|-------------|---------------------------------------------|-------------------|--------------------------------------------------|
|    |                                                                 |             | Sensor type                                 | Measurement range | Accuracy information                             |
| 1  | Kecheer                                                         | 3,589       | Unknown                                     | Unknown           | Unknown                                          |
| 2  | Walfront                                                        | 4,909       | Unknown                                     | 0–9,999           | ±50 ppm<br>± 5% rdg<br>(0-5000 ppm)<br>0.05% FSO |
| 3  | ROOMMATE<br>Tokyo Deco                                          | 3,480       | Unknown                                     | 400–5,000         | Unknown                                          |
| 4  | Sign Kingdom<br>Xmonitor-r1                                     | 3,680       | NDIR                                        | Unknown           | Unknown                                          |
| 5  | KKmoon                                                          | 4,899       | Unknown                                     | 350–2,000         | Unknown                                          |
| 6  | Elikliv-10                                                      | 2,900       | Unknown                                     | Unknown           | Unknown                                          |
| 7  | Atmonas                                                         | 4,999       | NDIR                                        | 400–5,000         | Unknown                                          |



|    |                          |        |         |           |                                                                                  |
|----|--------------------------|--------|---------|-----------|----------------------------------------------------------------------------------|
| 8  | Seawardi                 | 3,009  | Unknown | Unknown   | Error variation<br>3 to 30%                                                      |
| 9  | Rain Queen               | 4,700  | Unknown | 400–6,000 | $\pm 50 \pm 5\%$                                                                 |
| 10 | Lnicez                   | 4,298  | NDIR    | 400–5,000 | Unknown                                                                          |
| 11 | IUGGAN                   | 4,800  | Unknown | 400–5,000 | Unknown                                                                          |
| 12 | YC22                     | 4,599  | Unknown | 400–5,000 | Unknown                                                                          |
| A  | T&D<br>TR-76Ui           | 54,780 | NDIR    | 0–9,999   | CO <sub>2</sub> $\pm 50$<br>ppm or $\pm 5\%$<br>of reading at<br>$\leq 5000$ ppm |
| B  | C.H.C.System<br>NMA-PR-R | 47,500 | NDIR    | 0–3,000   | $\pm 75$ ppm or<br>$\pm 5\%$<br>(whichever is<br>greater)                        |

169

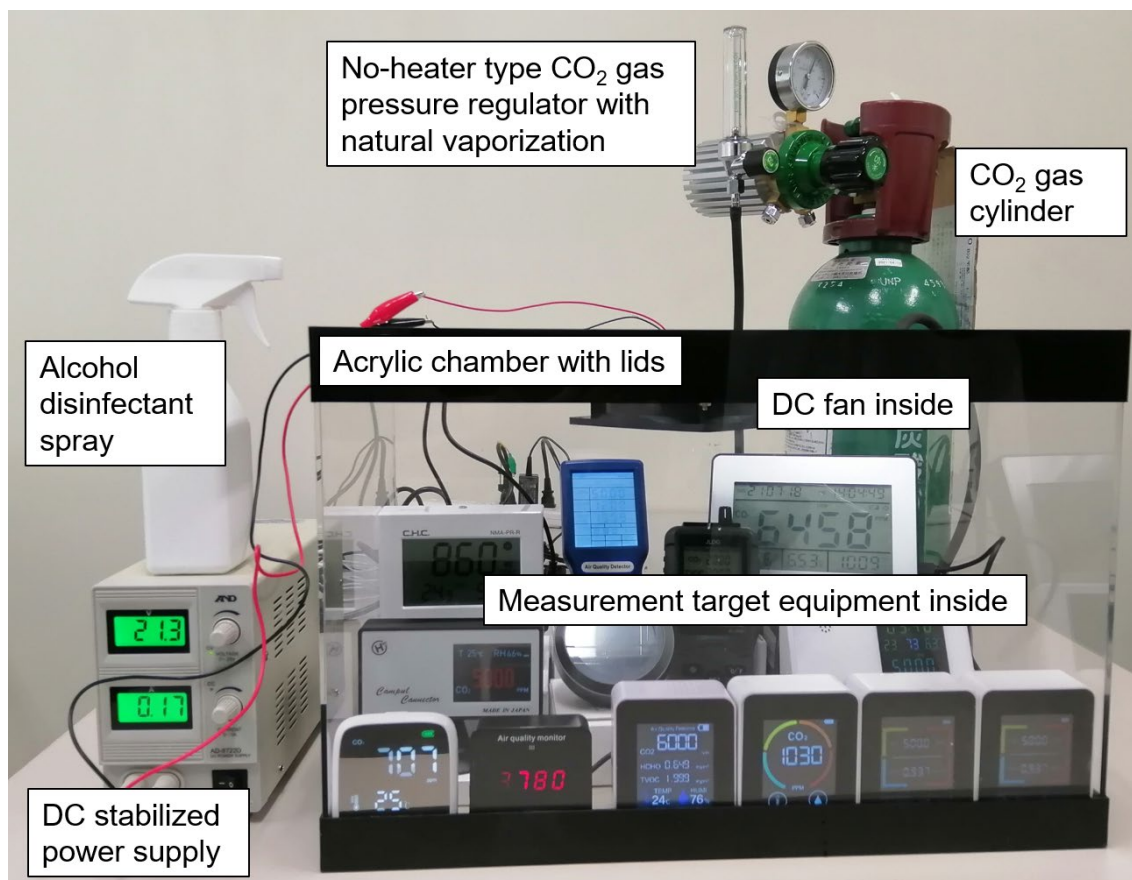

170

171 Figure 1. Image of experimental equipment and setup used for an investigation  
172 of the accuracy of 12 CO<sub>2</sub> sensors.

173

## 174 Results and Discussion

175 We compared the CO<sub>2</sub> values of the 12 investigated sensors to those of the  
176 reference sensors (A and B; Fig. 2). The relatively expensive sensor B showed a  
177 narrower measurement range than sensor A, although both had very similar  
178 response characteristics. Sensor 10 generally displayed higher values than  
179 sensor A, while sensors 4 and 7 displayed lower values than sensor A. Although  
180 sensor 2 responded to CO<sub>2</sub>, it seemed to malfunction, as it displayed very high

181 CO<sub>2</sub> values. Sensors 1, 3, 5, 6, 8, 9, and 12 did not seem to respond to CO<sub>2</sub> levels.  
182 As these seven sensors are able to display total volatile organic compound  
183 (tVOC) values, we conducted an additional experiment by applying approximately  
184 5 ml of rubbing alcohol to the inside of the acrylic plate of the chamber.  
185

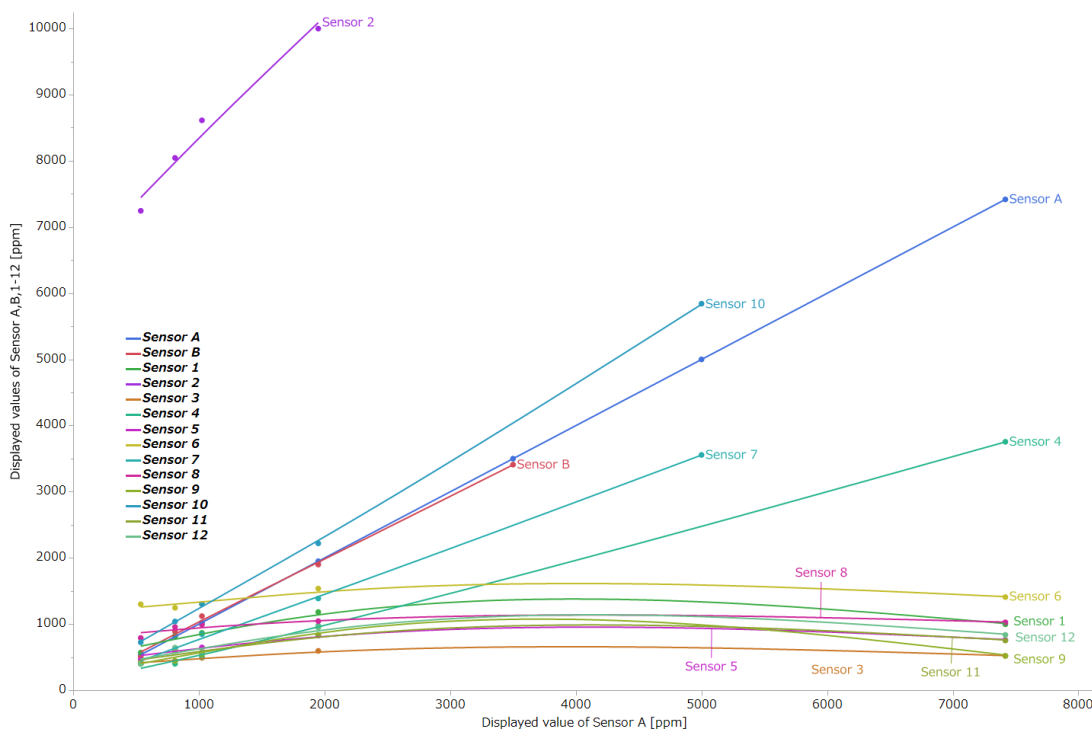

186  
187 Figure 2. Response characteristics of CO<sub>2</sub> sensors. Measured values of sensor  
188 A, the reference device, are plotted on the horizontal axis, and the measured  
189 values of sensors A, B, and 1 to 12 are plotted on the vertical axis, connected  
190 by spline curves.

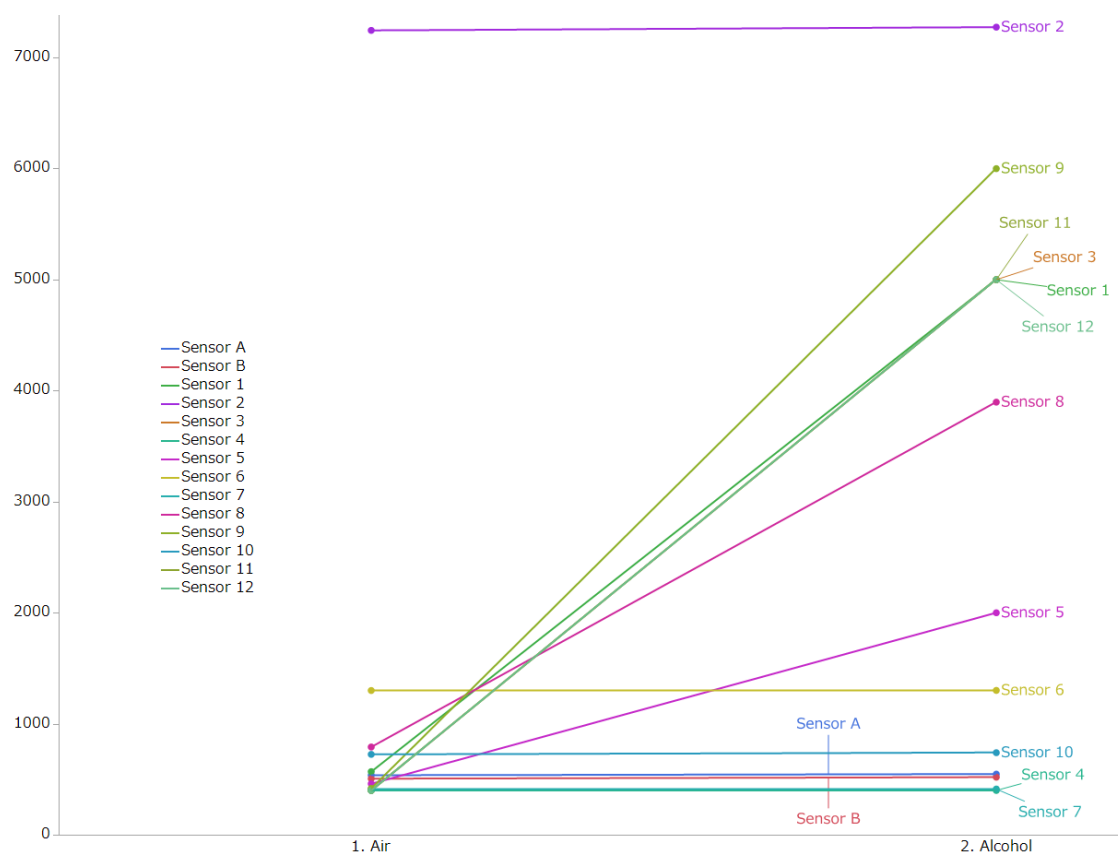

191

192 Figure 3. Response characteristics of 14 CO<sub>2</sub> sensors to alcohol, including two  
193 reference sensors (A and B). “1. Air” on the x-axis corresponds to the sixth step  
194 (FRESH AIR) in the experimental protocol, while “2. Alcohol” refers to the  
195 twelfth step of the protocol (CONTROLLED AIR), with 5 ml of alcohol added to  
196 the chamber at the step 8 (INJECTION) instead of CO<sub>2</sub>.

197

198 During this experiment, rather than adding CO<sub>2</sub> gas, 5 ml of alcohol was  
199 sprayed on the acrylic wall in the chamber (Fig. 3). To eliminate the cross-  
200 recruitment and contamination effect of alcohol, the experiment was performed  
201 independently to the previous experiment.

202

203

Our results (Fig. 3) indicate that the readings of sensors A, B, 2, 4, 6, 7, and 10 were not affected by the presence of alcohol. On the other hand, sensors 1,

204 3, 8, 9, 11, and 12 reacted strongly to alcohol. Furthermore, these six sensors  
205 were part of the group of seven sensors that did not respond to CO<sub>2</sub> (Fig. 2). The  
206 remaining sensor 6 appeared to respond neither to CO<sub>2</sub> nor to alcohol.

207 Of the 12 relatively low-cost sensors investigated in this study, three models  
208 (sensors 4, 7, and 10; 25% of the total) can potentially be used to determine CO<sub>2</sub>  
209 concentration levels, if correctly calibrated. However, the accuracy of the sensors  
210 was not as good as that of the more expensive reference sensors. Machine  
211 learning methods have been proposed for calibration of inexpensive sensors [12,  
212 13]. Sensor 2 seemed to be malfunctioning (8% of the total), while eight sensor  
213 models (67%) did not respond to CO<sub>2</sub>, and seven of these (58% of the total)  
214 responded strongly to alcohol, suggesting that the sensors were equipped with  
215 different sensors to the CO<sub>2</sub> sensing module.

216 To investigate the sensing module, we purchased and disassembled an extra  
217 model of sensor 12 (Fig. 4). Notably, the NDIR sensor was not present. Based on  
218 the model number of the sensing module and the manufacturer's specifications  
219 [14], we identified that the sensor was not designed for CO<sub>2</sub> measurements, but  
220 rather for the measurement of “ammonia, hydrogen, alcohol, carbon monoxide,  
221 methane, propane, Gan, styrene, propylene glycol, alkyl phenol, toluene,  
222 ethylbenzene, xylene, formaldehyde, and other volatile organic gases, incense  
223 smoke, wood, paper smoke burning out.” This suggests that sensor 12 is  
224 designed to display the concentration of CO<sub>2</sub> by a type of imitating algorithm  
225 based on the value of the sensing module that detects miscellaneous gases,  
226 excluding CO<sub>2</sub>.

227 Globally, several sensors display a very vaguely defined measurement  
228 called eCO<sub>2</sub> (equivalent CO<sub>2</sub>). This is estimated from the tVOC value and has  
229 been shown to differ from the actual CO<sub>2</sub> concentration [15].

230 Sensors 1, 3, 8, 9, 11, and 12, which responded strongly to alcohol (Fig. 3),  
231 all displayed tVOC values separately from the CO<sub>2</sub> concentration. Therefore, we  
232 suspected that these six sensor models were displaying eCO<sub>2</sub> values rather than  
233 actual CO<sub>2</sub> concentrations. However, the sales pages for these six sensors did  
234 not indicate that they used eCO<sub>2</sub> sensors.

235

236

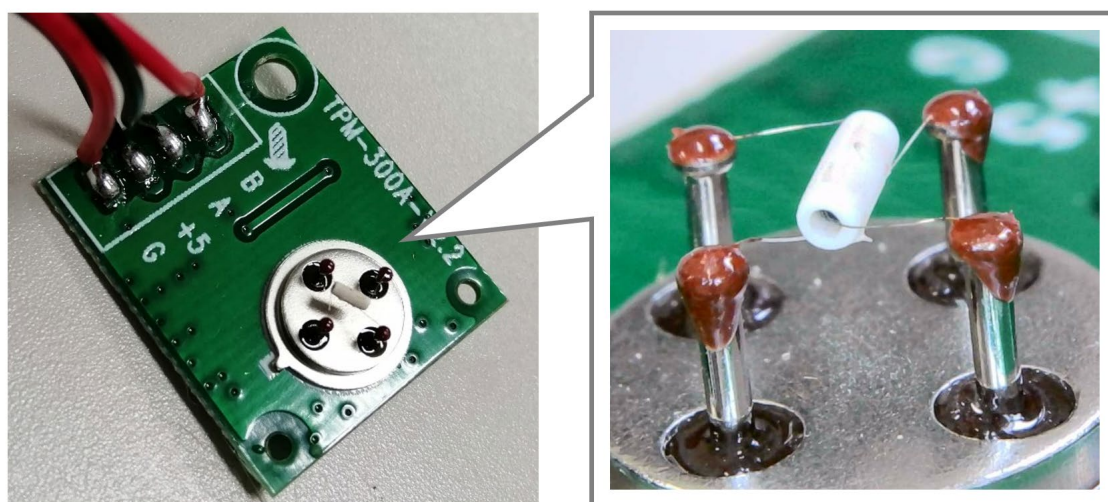

237

238 Figure 4. Sensing module of Sensor 12. A cylindrical object was suspended  
239 in the air by four wire bonds, and inside it was a coil heater.

240

241 Based on the results of our experiments, we developed a simple method for  
242 consumers to verify the quality of sensors on offer, without needing specialized  
243 equipment. Within this context, we recommend the following:

244

- 245 1. Ensure that the sensor displays a value of approximately 400 ppm in  
246 fresh air outdoors (this will allow for the detection of faulty sensors such  
247 as sensor 2, with a large deviation in CO<sub>2</sub> values).
- 248 2. Ensure that the CO<sub>2</sub> concentration rises significantly when breathing on  
249 the sensor (this will help identify sensors that do not respond to increases  
250 in CO<sub>2</sub>, such as Sensors 1, 3, 5, 6, 8, 9, and 12).
- 251 3. Ensure that the sensor does not react erroneously to alcohol by holding  
252 a hand dipped in an alcohol disinfectant close to the sensor (this  
253 eliminates low-quality sensors that pseudo-indicate CO<sub>2</sub> concentration  
254 from tVOC concentrations such as alcohol).

255

## 256 **Conclusions**

257 Twenty-five percent of the relatively low-cost sensors investigated in this  
258 study have the potential to be used for identifying trends in CO<sub>2</sub> concentration, if  
259 correctly calibrated, although with a poor accuracy. Notably, 67% of the sensors  
260 did not respond to changes in CO<sub>2</sub> levels, which suggests that various pseudo-  
261 masquerading techniques are being used to display CO<sub>2</sub> concentrations. These  
262 sensors should not be used to prevent the spread of infectious diseases. In  
263 addition, 58% of the sensors reacted strongly to alcohol. As alcohol is widely used  
264 indoors to prevent the spread of COVID-19, sensors that respond to alcohol will  
265 display inflated values, which can lead to incorrect ventilation behavior. Therefore,  
266 we strongly recommended that these sensors not be used.

267 This study was conducted using a total of 14 commercially available sensor  
268 models. However, there are many models of CO<sub>2</sub> sensors available in the market.

269 We suggest that future research focus on an exhaustive analysis of the sensors  
270 available in the market as a basis for a discussion on the guidelines and  
271 regulations for CO<sub>2</sub> sensors. We are planning to use gas chromatography with  
272 an accuracy of  $\pm 0.1$  ppm to simultaneously detect the concentration of alcohol  
273 and carbon dioxide for more accurate verification. With this method, we will be  
274 able to measure both organic and inorganic gases, which was not possible before.

275 In addition, clarification of the electrical circuit, catalyst, semiconductor  
276 composition, and solid-state properties of the sensing modules (Fig. 4) will assist  
277 to pinpointing the purpose for which these sensors were developed. Furthermore,  
278 we suggest that future research focus on not only conducting exposure  
279 experiments with pure CO<sub>2</sub> gas, but also include accurate measurements with  
280 human-derived CO<sub>2</sub> gases, including various volatile organic compounds.

281

## 282 **Notes**

283 The authors declare no conflicts of interest. This paper has been previously  
284 submitted to medRxiv, a preprint server for health sciences. This study was  
285 approved by the Ethics Committee on Experiments on Human Subjects (approval  
286 number of 21005), The University of Electro-communications, located at  
287 Chofugaoka 1-5-1, Chofu, Tokyo, Japan.

288

## 289 **Acknowledgments**

290 This work was supported by the Research Grant Program of the KDDI Foundation.  
291 In addition, some of the data acquisition technologies in this study are based on  
292 results obtained from a project commissioned by the New Energy and Industrial  
293 Technology Development Organization (NEDO).

294

## 295 **Data availability**

296 The raw data of the graphs are available on FigShare.



297 [https://figshare.com/articles/figure/Accuracy\\_verification\\_of\\_low-](https://figshare.com/articles/figure/Accuracy_verification_of_low-cost_CO2_concentration_measuring_devices_for_general_use_as_a_countermeasure_against_infectious_diseases/15067557)  
298 [cost\\_CO2\\_concentration\\_measuring\\_devices\\_for\\_general\\_use\\_as\\_a\\_counterm](https://figshare.com/articles/figure/Accuracy_verification_of_low-cost_CO2_concentration_measuring_devices_for_general_use_as_a_countermeasure_against_infectious_diseases/15067557)  
299 [easure\\_against\\_infectious\\_diseases/15067557](https://figshare.com/articles/figure/Accuracy_verification_of_low-cost_CO2_concentration_measuring_devices_for_general_use_as_a_countermeasure_against_infectious_diseases/15067557)

300

## 301 **References**

- 302 1) CDC (Centers for Disease Control and Prevention), SARS-CoV-2  
303 Transmission, Summary of recent changes, Updated May 7, 2021  
304 Online: [https://www.cdc.gov/coronavirus/2019-ncov/science/science-](https://www.cdc.gov/coronavirus/2019-ncov/science/science-briefs/sars-cov-2-transmission.html)  
305 [briefs/sars-cov-2-transmission.html](https://www.cdc.gov/coronavirus/2019-ncov/science/science-briefs/sars-cov-2-transmission.html) (accessed 25 July 2021)
- 306 2) Azimi P, Keshavarz Z, Laurent JGC, Stephens B, Allen JG. Mechanistic  
307 transmission modeling of COVID-19 on the Diamond Princess cruise ship  
308 demonstrates the importance of aerosol transmission. *Proc Natl Acad Sci*  
309 2021; 118(8) e2015482118; DOI: 10.1073/pnas.2015482118.
- 310 3) Memarzadeh F. Room Ventilation and Airborne Disease Transmission,  
311 American Hospital Association, Editor: The American Society for Healthcare  
312 Engineering; 2013.
- 313 4) Wells WF. *Airborne contagion and air hygiene*. Harvard: Harvard University  
314 Press, 1955.
- 315 5) Riley EC, Murphy G, Riley RL. Airborne spread of measles in a suburban  
316 elementary school. *Am J Epidemiol* 1978; 107: 421-432.
- 317 6) Buonanno G, Stabile L, Morawska L. Estimation of airborne viral emission;  
318 Quanta emission rate of SARS CoV-2 for infection risk assessment. *Environ*  
319 *Int* 2020; 141: 1–8.
- 320 7) Du CR, Wang SC, Yu MC, Chiu TF, Wang JY, Chuang PC, Jou R, Chan PC,  
321 Fang CT. Effect of ventilation improvement during a tuberculosis outbreak in  
322 underventilated university buildings, *Indoor Air* 2019; 30(3); 422-432.
- 323 8) The Occupational Hygiene and Ergonomics Subcommittee of the Japan  
324 Society for Occupational Health (JSOH): Ventilation simulator for COVID-19  
325 countermeasures (COVID-19 Taisaku-you Kanki Simulator). Online:  
326 [http://jsoh-](http://jsoh-oh.e.umin.jp/covid_simulator/ventilation_simulator_manual_ver1.0.pdf)  
327 [oh.e.umin.jp/covid\\_simulator/ventilation\\_simulator\\_manual\\_ver1.0.pdf](http://jsoh-oh.e.umin.jp/covid_simulator/ventilation_simulator_manual_ver1.0.pdf)  
328 (accessed 25 July 2021)
- 329 9) Eykelbosh, A. Indoor CO<sub>2</sub> Sensors for COVID-19 Risk Mitigation: Current  
330 Guidance and Limitations. Vancouver, BC: National Collaborating Centre for  
331 Environmental Health. 2021 May.

- 332 Online: [https://ncceh.ca/documents/field-inquiry/indoor-co2-sensors-COVID-](https://ncceh.ca/documents/field-inquiry/indoor-co2-sensors-COVID-19-risk-mitigation-current-guidance-and)  
333 [19-risk-mitigation-current-guidance-and](https://ncceh.ca/documents/field-inquiry/indoor-co2-sensors-COVID-19-risk-mitigation-current-guidance-and) (accessed 25 July 2021).
- 334 10) Lewis AC, Lee JD, Edwards PM, Shaw MD, Evans MJ, Moller SJ, Smith KR,  
335 Buckley JW, Ellis M, Gillot SR, Whited A. Evaluating the performance of low  
336 cost chemical sensors for air pollution research. Faraday Discuss 2016; 189  
337 Online: <https://doi.org/10.1039/C5FD00201J> (accessed 25 July 2021).
- 338 11) Castell N, Dauge FR, Schneider P, Vogt M, Lerner U, Fishbain B, Broday D,  
339 Bartonova A. Can commercial low-cost sensor platforms contribute to air  
340 quality monitoring and exposure estimates? Environ Int 2017; 99: 293-302,  
341 ISSN 0160-4120, 2017.  
342 Online: <https://doi.org/10.1016/j.envint.2016.12.007> (accessed 25 July 2021)
- 343 12) Zimmerman N, Presto AA, Kumar SPN, Gu J, Hauryliuk A, Robinson ES,  
344 Robinson AL, Subramanian R. A machine learning calibration model using  
345 random forests to improve sensor performance for lower-cost air quality  
346 monitoring. Atmos Meas Tech, 2018; 11:291–313.  
347 Online: <https://doi.org/10.5194/amt-11-291-2018> (accessed 25 July 2021)
- 348 13) Zaidan MA, Motlagh NH, Fung PL, Lu D, Timonen H, Kuula J, Niemi JV,  
349 Tarkoma S, Petäjä T, Kulmala M, Hussein T. Intelligent Calibration and Virtual  
350 Sensing for Integrated Low-Cost Air Quality Sensors. IEEE Sensors Journal  
351 2020; 20(22): 13638-13652 doi: 10.1109/JSEN.2020.3010316.  
352 Online: <https://ieeexplore.ieee.org/document/9144227> (accessed 25 July  
353 2021)
- 354 14) TPM-300 Air Quality Module Intelligent Air Quality Monitoring Module Air  
355 Sensor  
356 Online: [https://ardubotics.eu/en/sensors/1243-tpm-300-air-quality-module-](https://ardubotics.eu/en/sensors/1243-tpm-300-air-quality-module-intelligent-air-quality-monitoring-module-air-sensor.html)  
357 [intelligent-air-quality-monitoring-module-air-sensor.html](https://ardubotics.eu/en/sensors/1243-tpm-300-air-quality-module-intelligent-air-quality-monitoring-module-air-sensor.html) (accessed 25 July  
358 2021)
- 359 15) Varzaru G, Zarnescu A, Ungurelu R, Secere M. Dismantling the confusion  
360 between the equivalent CO<sub>2</sub> and CO<sub>2</sub> concentration levels. 11th International  
361 Conference on Electronics, Computers and Artificial Intelligence (ECAI)  
362 2019: pp. 1-4, doi: 10.1109/ECAI46879.2019.9042113.
